# Supplementary material for: Characterization of Escherichia coli from Edible Insect Species: Detection of Shiga Toxin-Producing Isolate
Source: MDPI journal article supplement (doi:10.3390/foods10112552), 2021-10-22
Supplement: s1 [file s1]

XbaI - LT2

XbaI - LT2

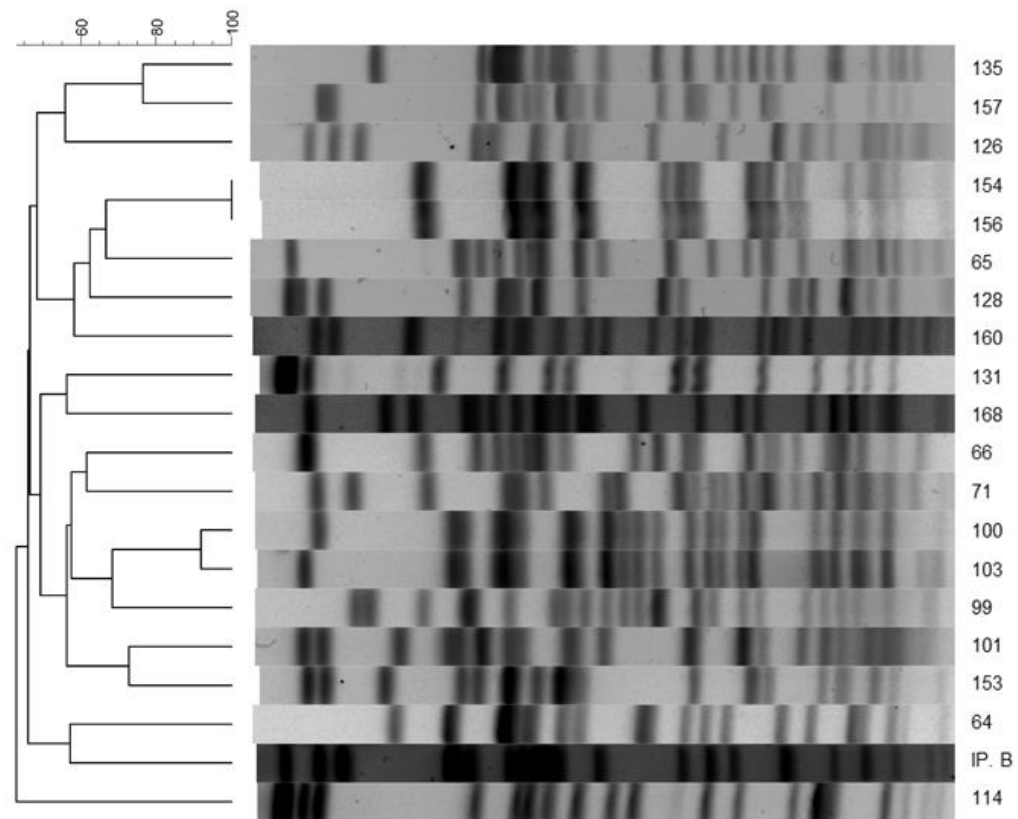

**Figure S1.** *XbaI* macrorestriction results including band patterns of individual isolates.

**Table S1.** Assembly statistics and quality parameters of genome sequences.

| <b>Isolate ID</b> | <b># contigs<br/>(≥0 bp)</b> | <b># contigs<br/>(≥ 1000 bp)</b> | <b>Total length<br/>(≥0 bp)</b> | <b>Total length<br/>(≥ 1000 bp)</b> | <b># contigs</b> | <b>Largest<br/>contig</b> | <b>Total<br/>length</b> | <b>GC<br/>(%)</b> | <b>N50</b> | <b>N75</b> | <b>L50</b> | <b>L75</b> | <b># N's per<br/>100 kbp</b> |
|-------------------|------------------------------|----------------------------------|---------------------------------|-------------------------------------|------------------|---------------------------|-------------------------|-------------------|------------|------------|------------|------------|------------------------------|
| <b>64</b>         | 125                          | 53                               | 4812180                         | 4784632                             | 69               | 545548                    | 4796453                 | 50.45             | 212413     | 119287     | 8          | 15         | 0.00                         |
| <b>65</b>         | 156                          | 83                               | 4834403                         | 4811360                             | 91               | 352142                    | 4817549                 | 50.97             | 174526     | 107358     | 10         | 19         | 0.00                         |
| <b>66</b>         | 222                          | 74                               | 4928960                         | 4877047                             | 94               | 391126                    | 4890924                 | 50.61             | 208998     | 94308      | 9          | 16         | 0.00                         |
| <b>71</b>         | 215                          | 76                               | 5091807                         | 5051299                             | 90               | 305183                    | 5061310                 | 50.68             | 150590     | 82082      | 13         | 24         | 0.00                         |
| <b>99</b>         | 159                          | 58                               | 5175455                         | 5141369                             | 71               | 367270                    | 5151143                 | 50.57             | 163527     | 109203     | 11         | 20         | 0.00                         |
| <b>100</b>        | 98                           | 38                               | 4869232                         | 4854088                             | 41               | 761994                    | 4855645                 | 50.84             | 511187     | 325760     | 4          | 7          | 0.00                         |
| <b>101</b>        | 104                          | 38                               | 4924721                         | 4903580                             | 45               | 500887                    | 4908911                 | 50.63             | 213587     | 137220     | 8          | 15         | 0.00                         |
| <b>103</b>        | 105                          | 38                               | 5265049                         | 5246405                             | 42               | 795016                    | 5248741                 | 50.56             | 412899     | 245370     | 5          | 9          | 0.00                         |
| <b>114</b>        | 212                          | 94                               | 5337364                         | 5292652                             | 119              | 651633                    | 5310458                 | 50.59             | 211470     | 96659      | 7          | 17         | 0.00                         |
| <b>126</b>        | 337                          | 129                              | 4795997                         | 4739800                             | 155              | 244375                    | 4756419                 | 50.79             | 90578      | 45969      | 17         | 34         | 0.00                         |
| <b>128</b>        | 141                          | 72                               | 4845249                         | 4822389                             | 81               | 438216                    | 4828747                 | 50.97             | 220643     | 121521     | 8          | 15         | 0.00                         |
| <b>131</b>        | 156                          | 79                               | 4856200                         | 4833780                             | 86               | 367493                    | 4838529                 | 50.60             | 139646     | 90875      | 13         | 24         | 0.00                         |
| <b>135</b>        | 115                          | 49                               | 4799128                         | 4779429                             | 57               | 472242                    | 4784459                 | 50.78             | 207325     | 121648     | 8          | 16         | 0.00                         |
| <b>153</b>        | 118                          | 47                               | 4696194                         | 4673525                             | 56               | 630882                    | 4679456                 | 50.63             | 227395     | 125726     | 7          | 14         | 0.00                         |
| <b>154</b>        | 69                           | 35                               | 4713310                         | 4701543                             | 41               | 640731                    | 4706176                 | 50.77             | 325377     | 189889     | 6          | 10         | 0.00                         |
| <b>156</b>        | 95                           | 46                               | 4717564                         | 4700929                             | 53               | 417066                    | 4705837                 | 50.77             | 210407     | 111716     | 8          | 15         | 0.00                         |
| <b>157</b>        | 78                           | 36                               | 4626437                         | 4614108                             | 38               | 1178073                   | 4615632                 | 50.76             | 208379     | 137285     | 5          | 11         | 0.00                         |
| <b>160</b>        | 208                          | 101                              | 5129725                         | 5093085                             | 118              | 453363                    | 5105314                 | 50.79             | 137090     | 61293      | 12         | 26         | 0.00                         |
| <b>168</b>        | 237                          | 94                               | 5061773                         | 5016484                             | 114              | 444072                    | 5030657                 | 50.68             | 157415     | 107078     | 10         | 20         | 0.00                         |
| <b>IPA</b>        | 163                          | 85                               | 4700400                         | 4675821                             | 96               | 257563                    | 4683635                 | 50.84             | 102665     | 65595      | 16         | 31         | 0.00                         |
| <b>IPB</b>        | 89                           | 25                               | 4694634                         | 4673402                             | 35               | 967268                    | 4680805                 | 50.78             | 318239     | 157261     | 5          | 10         | 0.00                         |
